# Supplementary material
Source: publisher figshare collection journal article supplement (https://asha.figshare.com/articles/dataset/_/20422236)
Supplement: Supplementary file 1 [file 1]

**Supplemental Material S2.** Loadings of original variables (normalized F3–F2 distance at pretreatment, posttraditional, and posttreatment time points) on PCA components. Loadings less than .1 are not displayed.

|                 | <b>Component 1</b> | <b>Component 2</b> | <b>Component 3</b> |
|-----------------|--------------------|--------------------|--------------------|
| Pretreatment    | .620               |                    | .784               |
| Posttraditional | .672               | .499               | –.547              |
| Posttreatment   | .406               | –.866              | –.291              |
