# Supplementary material
Source: publisher figshare collection journal article supplement (https://asha.figshare.com/articles/dataset/_/20422236)
Supplement: Supplementary file 2 [file 1]

**Supplemental Material S1.** List of stimuli used to assess stimulability and word-level production at pre-treatment, post-traditional, and post-treatment time points. The stimulability probe includes instructions for scoring and selection of targets for use in treatment.

### Stimulability Probe

- Scoring: Mark each /r/ target with 1 or 0. Only a fully correct, adultlike /r/ sound should be given a score of 1. Distortions or substitutions receive a score of 0. If some attempts sound more accurate than others, but are not fully correct, make a note below the corresponding box.
- **Directions:** “Now we’re going to say some syllables with /r/ in them. I want you to listen and watch me, then do what I did. Try to make your very best /r/ sound.” Provide a model with each attempt.

| Category                 | Syllable     | Attempt (1-3) |  |  | Number correct | Comments |
|--------------------------|--------------|---------------|--|--|----------------|----------|
| <b>ʒ</b>                 | mʒ           |               |  |  |                |          |
|                          | dʒ           |               |  |  |                |          |
|                          | ʒg           |               |  |  |                |          |
| <b>Consonantal Front</b> | #ri          |               |  |  |                |          |
|                          | #re          |               |  |  |                |          |
|                          | #rai         |               |  |  |                |          |
| <b>Consonantal Back</b>  | #ru          |               |  |  |                |          |
|                          | #ro          |               |  |  |                |          |
|                          | #ra          |               |  |  |                |          |
| <b>Vocalic Front</b>     | ir#          |               |  |  |                |          |
|                          | er#          |               |  |  |                |          |
|                          | aɪə#         |               |  |  |                |          |
| <b>Vocalic Back</b>      | or#          |               |  |  |                |          |
|                          | ar#          |               |  |  |                |          |
|                          | auə#         |               |  |  |                |          |
|                          | <b>Total</b> |               |  |  | /45            |          |

- Target Selection for PTR study: 8 total syllables
  1. Select two syllables that are the lowest accuracy in the /ʒ/ category for treatment.
  2. There are 4 remaining categories (consonantal front and back, vocalic front and back). Select 3 of these categories for treatment based on the lowest average accuracy. Within the 3 categories selected, pick two of the three syllable targets. Circle the 8 total syllables in the “Syllable” category that will be used for treatment.

## Word Probe List

|        |        |
|--------|--------|
| beard  | rose   |
| butter | robe   |
| scarf  | cheer  |
| chair  | turn   |
| dark   | race   |
| farm   | rake   |
| share  | raw    |
| mother | stir   |
| nurse  | board  |
| rude   | barn   |
| rock   | rob    |
| flower | run    |
| floor  | wrong  |
| star   | ladder |
| year   | door   |
| tear   | stare  |
| rug    | sword  |
| reach  | fork   |
| rip    | ring   |
| rules  | raft   |
| weird  | wrap   |
| worm   | clear  |
| sir    | hammer |
| read   | red    |
| scare  | ride   |
