# Supplementary material
Source: publisher figshare collection journal article supplement (https://asha.figshare.com/articles/dataset/_/20422236)
Supplement: Supplementary file 3 [file 1]

**Supplemental Material S3.** Complete results of multivariate logistic regression models used to test for differences between clusters.

**Model 1, no interaction. Variables:** `pcaCluster2` = cluster assignment in model-based clustering on PCA scores (2-cluster solution); `age_mos` = age in months; `aud_acuity_pre` = width of fitted boundary region on *rake-wake* identification task; `stereognosis_pre` = mean letter size on oral stereognosis task.

Call:

```
glm(formula = pcaCluster2 ~ age_mos + aud_acuity_pre + stereognosis_pre,
family = binomial, data = modeldatacomplete)
```

Deviance Residuals:

|         |         |         |        |        |
|---------|---------|---------|--------|--------|
| Min     | 1Q      | Median  | 3Q     | Max    |
| -1.4314 | -1.0130 | -0.6875 | 1.1763 | 1.6348 |

Coefficients:

|                               | Estimate | Std.<br>Error | z value | p.value |
|-------------------------------|----------|---------------|---------|---------|
| (Intercept)                   | -0.25    | 4.60          | -0.05   | 0.96    |
| <code>age_mos</code>          | 0.01     | 0.03          | 0.49    | 0.63    |
| <code>aud_acuity_pre</code>   | -0.17    | 0.25          | -0.67   | 0.50    |
| <code>stereognosis_pre</code> | -0.21    | 0.34          | -0.62   | 0.54    |

(Dispersion parameter for binomial family taken to be 1)

Null deviance: 34.296 on 24 degrees of freedom

Residual deviance: 32.381 on 21 degrees of freedom

AIC: 40.381

**Model 2, with interaction between sex and auditory acuity based on previous literature. Variables:**  
**pcaCluster2** = cluster assignment in model-based clustering on PCA scores (2-cluster solution);  
**age\_mos** = age in months; **sexM** = participant sex, reference level: male; **aud\_acuity\_pre** = width of fitted boundary region on *rake-wake* identification task; **stereognosis\_pre** = mean letter size on oral stereognosis task.

Call:

```
glm(formula = pcaCluster2 ~ age_mos + sex * aud_acuity_pre + stereognosis_pre,
family = binomial, data = modeldatacomplete)
```

Deviance Residuals:

|         |         |         |        |        |
|---------|---------|---------|--------|--------|
| Min     | 1Q      | Median  | 3Q     | Max    |
| -1.3652 | -1.0153 | -0.6454 | 1.1141 | 1.5656 |

Coefficients:

| term                | estimate | std.error | statistic | p.value |
|---------------------|----------|-----------|-----------|---------|
| (Intercept)         | -0.04    | 5.02      | -0.01     | 0.99    |
| age_mos             | 0.02     | 0.03      | 0.71      | 0.48    |
| sexM                | -0.89    | 1.87      | -0.48     | 0.63    |
| aud_acuity_pre      | -0.21    | 0.46      | -0.46     | 0.65    |
| stereognosis_pre    | -0.30    | 0.36      | -0.82     | 0.41    |
| sexM:aud_acuity_pre | 0.01     | 0.56      | 0.01      | 0.99    |

(Dispersion parameter for binomial family taken to be 1)

Null deviance: 34.296 on 24 degrees of freedom

Residual deviance: 31.606 on 19 degrees of freedom

AIC: 43.606

Number of Fisher Scoring iterations: 4
